# Supplementary material
Source: Springer Nature journal article supplement (https://www.springermedizin.de/resource/supplementary/13041_2009_29_MOESM8_ESM.pdf/25657444)

**a**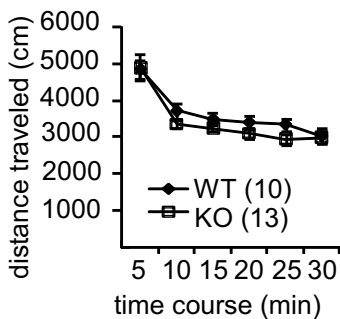**b**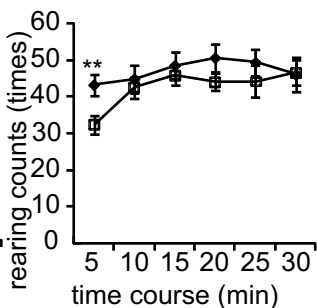**c**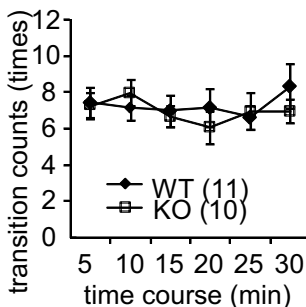**d**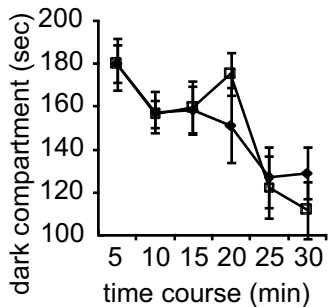**e**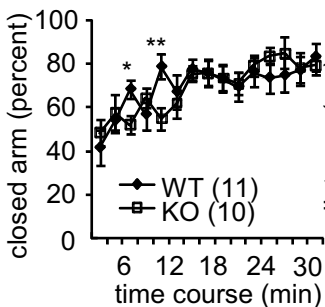**f**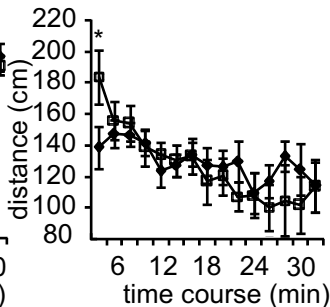

Supplement: MOESM8 [file 25657444]
